# Supplementary material for: Leveraging effect size distributions to improve polygenic risk scores derived from summary statistics of genome-wide association studies
Source: PLoS Comput Biol. 2020 Feb 11;16(2):e1007565. doi: 10.1371/journal.pcbi.1007565 (PMC7039528; doi:10.1371/journal.pcbi.1007565)
Supplement: S1 Table — The highest mean r2 and AUCs are highlighted in boldface. (XLSX) [file pcbi.1007565.s001.xlsx]

## Sheet: Table S1
Table S1. Predictive r2 and AUC of EB-PRS, P+T, So et al.'s method and Mak et al.'s method under different training sample sizes and control-to-case ratios (CCRs) in simulation experiments with independent SNPs. The allele frequencies follow uniform distribution. The highest mean r2 and AUCs are highlighted in boldface.
(a) CCR=1
Sample size	Evaluation	EB-PRS	P+T	So et al.'s	Mak et al.'s
2000	predictive r2	0.284063	0.223054	0.232221	0.00654695
	AUC	0.81091	0.77087	0.77933	0.54181
4000	predictive r2	0.364209	0.329409	0.343309	0.00607287
	AUC	0.85652	0.83915	0.84603	0.53562
6000	predictive r2	0.397154	0.364008	0.386198	0.0127451
	AUC	0.87199	0.85407	0.86606	0.55197
8000	predictive r2	0.434679	0.417846	0.421918	0.0071679
	AUC	0.8918	0.88238	0.88539	0.54132
10000	predictive r2	0.441136	0.425942	0.424162	0.00456948
	AUC	0.89564	0.89009	0.88636	0.53196
(b) CCR=2
Sample size	Evaluation	EB-PRS	P+T	So et al.'s	Mak et al.'s
2000	predictive r2	0.199566	0.160442	0.159165	0.00469748
	AUC	0.76049	0.73393	0.72823	0.53648
4000	predictive r2	0.365429	0.31607	0.33192	0.0108928
	AUC	0.85731	0.83065	0.83971	0.55432
6000	predictive r2	0.416847	0.389352	0.399728	0.0106597
	AUC	0.88435	0.87064	0.87524	0.54987
8000	predictive r2	0.423963	0.398525	0.411344	0.00398085
	AUC	0.88594	0.87462	0.87963	0.52455
10000	predictive r2	0.449829	0.431369	0.435953	0.004785
	AUC	0.8989	0.89056	0.89295	0.52967
(c) CCR=3
Sample size	Evaluation	EB-PRS	P+T	So et al.'s	Mak et al.'s
2000	predictive r2	0.161391	0.131467	0.130029	0.00506218
	AUC	0.73106	0.70587	0.70422	0.53611
4000	predictive r2	0.304367	0.266721	0.269149	0.00870175
	AUC	0.82364	0.80307	0.80494	0.54486
6000	predictive r2	0.365731	0.340406	0.339326	0.00817245
	AUC	0.85823	0.84705	0.84439	0.5443
8000	predictive r2	0.40822	0.386238	0.387903	0.0080236
	AUC	0.88278	0.86987	0.8708	0.54586
10000	predictive r2	0.448008	0.422322	0.430246	0.00937196
	AUC	0.89936	0.88691	0.88995	0.53865
(d) CCR=4
Sample size	Evaluation	EB-PRS	P+T	So et al.'s	Mak et al.'s
2000	predictive r2	0.156799	0.133899	0.0987102	0.00674231
	AUC	0.72617	0.7087	0.67577	0.53776
4000	predictive r2	0.289266	0.238453	0.243347	0.00804521
	AUC	0.81352	0.7844	0.7858	0.53723
6000	predictive r2	0.343167	0.309499	0.326197	0.00338697
	AUC	0.84555	0.82929	0.83554	0.5289
8000	predictive r2	0.375059	0.330886	0.357168	0.00774428
	AUC	0.86277	0.83917	0.85129	0.53963
10000	predictive r2	0.410879	0.38497	0.39642	0.00939014
	AUC	0.88174	0.86999	0.87478	0.55254
